CORRECTION

# Correction: Profiling Cellular Protein Complexes by Proximity Ligation with Dual Tag Microarray Readout

The *PLOS ONE* Staff

Four oligonucleotide sequences are missing from [S2 Table](#) of the published article. Please view the correct [S2 Table](#) here.

## Supporting Information

**S2 Table. List of oligonucleotides used in the experiments.** Listed are the sequences of all oligonucleotides used in the experiments together with their modifications in the 3'-free and 5'-free ends respectively.  
(TIF)

## Reference

1. Hammond M, Nong RY, Ericsson O, Pardali K, Landegren U (2012) Profiling Cellular Protein Complexes by Proximity Ligation with Dual Tag Microarray Readout. PLoS ONE 7(7): e40405. doi: [10.1371/journal.pone.0040405](https://doi.org/10.1371/journal.pone.0040405) PMID: [22808155](https://pubmed.ncbi.nlm.nih.gov/22808155/)

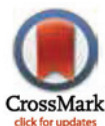

## OPEN ACCESS

**Citation:** The *PLOS ONE* Staff (2015) Correction: Profiling Cellular Protein Complexes by Proximity Ligation with Dual Tag Microarray Readout. PLoS ONE 10(3): e0119890. doi:10.1371/journal.pone.0119890

**Published:** March 25, 2015

**Copyright:** © 2015 The PLOS ONE Staff. This is an open access article distributed under the terms of the [Creative Commons Attribution License](https://creativecommons.org/licenses/by/4.0/), which permits unrestricted use, distribution, and reproduction in any medium, provided the original author and source are credited.
